# Supplementary material
Source: publisher figshare collection journal article supplement (https://tandf.figshare.com/articles/dataset/_/9872678)
Supplement: Supplementary file 1 [file 2]

## Supplementary information

**Table 1.** Results from MD simulations. The computed properties are the number density ( $n^*$ ), the volume per particle ( $v^* = 1/n^*$ ), pressure ( $P^*$ ), potential energy ( $U_{\text{pot}}/Nk_{\text{B}}T$ ), enthalpy per particle ( $H^*/N$ ), and compression factor ( $Z$ ). Data in the two-phase region have been omitted in the table.

| $T^*$ | $n^*$         | $v^*$         | $P^*$         | $U_p^*/Nk_{\text{B}}T^*$ | $H^*/N$       | $Z$         |
|-------|---------------|---------------|---------------|--------------------------|---------------|-------------|
| 2.00  | 0.0010±0.0000 | 1000±4        | 0.0020±0.0000 | -0.0011±0.0001           | 4.9977±0.0003 | 1.000±0.006 |
| 2.00  | 0.0100±0.0000 | 100.0±0.3     | 0.0200±0.0001 | -0.0222±0.0002           | 4.9525±0.0006 | 0.998±0.004 |
| 2.00  | 0.0500±0.0001 | 19.99±0.06    | 0.0996±0.0003 | -0.1100±0.0004           | 4.772±0.001   | 0.996±0.004 |
| 2.00  | 0.1000±0.0002 | 10.00±0.02    | 0.2000±0.0003 | -0.2177±0.0005           | 4.564±0.002   | 1.000±0.002 |
| 2.00  | 0.1250±0.0002 | 8.00±0.01     | 0.2514±0.0004 | -0.2706±0.0006           | 4.470±0.002   | 1.005±0.002 |
| 2.00  | 0.1666±0.0002 | 6.001±0.008   | 0.3401±0.0005 | -0.3583±0.0007           | 4.324±0.002   | 1.020±0.002 |
| 2.00  | 0.2000±0.0003 | 4.999±0.008   | 0.4152±0.0007 | -0.4283±0.0007           | 4.219±0.002   | 1.038±0.002 |
| 2.00  | 0.3000±0.0003 | 3.333±0.003   | 0.6761±0.0008 | -0.6360±0.0006           | 3.982±0.002   | 1.127±0.002 |
| 2.00  | 0.4000±0.0002 | 2.500±0.002   | 1.034±0.001   | -0.8437±0.0005           | 3.898±0.002   | 1.293±0.001 |
| 2.00  | 0.5001±0.0002 | 1.9998±0.0009 | 1.580±0.001   | -1.0521±0.0006           | 4.056±0.003   | 1.580±0.001 |
| 2.00  | 0.6000±0.0002 | 1.6667±0.0006 | 2.483±0.002   | -1.2547±0.0006           | 4.629±0.002   | 2.069±0.002 |
| 2.00  | 0.7000±0.0002 | 1.4286±0.0003 | 4.028±0.003   | -1.4345±0.0004           | 5.885±0.003   | 2.877±0.002 |
| 1.50  | 0.0010±0.0000 | 995±6         | 0.0015±0.0000 | -0.0017±0.0001           | 3.7466±0.0002 | 1.000±0.009 |
| 1.50  | 0.0100±0.0000 | 99.9±0.3      | 0.0149±0.0000 | -0.0342±0.0003           | 3.6845±0.0007 | 0.991±0.004 |
| 1.50  | 0.0500±0.0002 | 20.00±0.06    | 0.0718±0.0002 | -0.1683±0.0006           | 3.433±0.001   | 0.957±0.004 |
| 1.50  | 0.1000±0.0002 | 10.00±0.02    | 0.1387±0.0003 | -0.3302±0.0008           | 3.142±0.002   | 0.925±0.003 |
| 1.50  | 0.1251±0.0002 | 8.00±0.01     | 0.1711±0.0003 | -0.4103±0.0009           | 3.003±0.002   | 0.912±0.002 |
| 1.50  | 0.1667±0.0002 | 6.000±0.008   | 0.2246±0.0003 | -0.5389±0.0008           | 2.789±0.002   | 0.898±0.002 |
| 1.50  | 0.2000±0.0003 | 5.000±0.008   | 0.2679±0.0004 | -0.640±0.001             | 2.630±0.002   | 0.893±0.002 |
| 1.50  | 0.3000±0.0004 | 3.333±0.005   | 0.4109±0.0007 | -0.935±0.001             | 2.217±0.003   | 0.913±0.002 |
| 1.50  | 0.4000±0.0004 | 2.500±0.003   | 0.6037±0.0009 | -1.227±0.001             | 1.919±0.002   | 1.006±0.002 |
| 1.50  | 0.5000±0.0003 | 2.000±0.001   | 0.914±0.001   | -1.5223±0.0009           | 1.794±0.002   | 1.218±0.002 |
| 1.50  | 0.6000±0.0003 | 1.6666±0.0007 | 1.483±0.002   | -1.822±0.001             | 1.988±0.002   | 1.647±0.002 |
| 1.50  | 0.7000±0.0002 | 1.4286±0.0004 | 2.577±0.002   | -2.1081±0.0006           | 2.769±0.002   | 2.454±0.002 |
| 1.20  | 0.0010±0.0000 | 999±5         | 0.0012±0.0000 | -0.0047±0.0002           | 2.9922±0.0004 | 0.998±0.008 |
| 1.20  | 0.0100±0.0000 | 100.1±0.3     | 0.0118±0.0000 | -0.0488±0.0005           | 2.9192±0.0009 | 0.981±0.004 |
| 1.20  | 0.0500±0.0001 | 19.99±0.05    | 0.0548±0.0001 | -0.2403±0.0009           | 2.607±0.002   | 0.913±0.003 |
| 1.20  | 0.0999±0.0003 | 10.01±0.03    | 0.1008±0.0003 | -0.469±0.002             | 2.246±0.003   | 0.841±0.004 |
| 1.20  | 0.1250±0.0003 | 8.00±0.02     | 0.1214±0.0002 | -0.579±0.002             | 2.076±0.003   | 0.809±0.003 |
| 1.20  | 0.1669±0.0005 | 5.99±0.02     | 0.1531±0.0003 | -0.758±0.002             | 1.808±0.004   | 0.765±0.003 |
| 1.20  | 0.1998±0.0006 | 5.00±0.01     | 0.1770±0.0004 | -0.892±0.003             | 1.615±0.005   | 0.738±0.003 |
| 1.20  | 0.2999±0.0008 | 3.335±0.009   | 0.2487±0.0005 | -1.278±0.004             | 1.096±0.005   | 0.691±0.002 |
| 1.20  | 0.3999±0.0007 | 2.500±0.004   | 0.3417±0.0007 | -1.646±0.003             | 0.679±0.003   | 0.712±0.002 |
| 1.20  | 0.5001±0.0005 | 2.000±0.002   | 0.505±0.001   | -2.018±0.002             | 0.388±0.002   | 0.841±0.002 |
| 1.20  | 0.6000±0.0003 | 1.6667±0.0008 | 0.853±0.001   | -2.405±0.001             | 0.336±0.002   | 1.185±0.002 |
| 1.20  | 0.7000±0.0002 | 1.4285±0.0004 | 1.642±0.002   | -2.7957±0.0008           | 0.791±0.002   | 1.954±0.002 |
| 1.00  | 0.0010±0.0000 | 998±6         | 0.0010±0.0000 | -0.0035±0.0002           | 2.4950±0.0003 | 0.999±0.008 |
| 1.00  | 0.0100±0.0000 | 100.2±0.4     | 0.0097±0.0000 | -0.0661±0.0008           | 2.405±0.001   | 0.971±0.006 |
| 1.00  | 0.0500±0.0002 | 20.00±0.07    | 0.0431±0.0001 | -0.331±0.002             | 2.031±0.003   | 0.862±0.004 |
| 1.00  | 0.0999±0.0004 | 10.01±0.04    | 0.0745±0.0002 | -0.644±0.003             | 1.602±0.004   | 0.746±0.003 |
| 1.00  | 0.1252±0.0006 | 7.99±0.04     | 0.0868±0.0003 | -0.797±0.004             | 1.396±0.005   | 0.693±0.004 |
| 1.00  | 0.1667±0.0008 | 6.00±0.03     | 0.1032±0.0003 | -1.038±0.005             | 1.082±0.007   | 0.619±0.004 |
| 1.00  | 0.200±0.001   | 5.00±0.03     | 0.1140±0.0004 | -1.215±0.008             | 0.86±0.01     | 0.571±0.004 |
| 1.00  | 0.301±0.002   | 3.32±0.02     | 0.1403±0.0006 | -1.70±0.01               | 0.26±0.01     | 0.466±0.004 |
| 1.00  | 0.400±0.002   | 2.50±0.01     | 0.1700±0.0007 | -2.129±0.008             | -0.204±0.009  | 0.425±0.003 |
| 1.00  | 0.500±0.001   | 1.999±0.005   | 0.235±0.001   | -2.551±0.005             | -0.582±0.005  | 0.469±0.002 |
| 1.00  | 0.6000±0.0004 | 1.667±0.001   | 0.425±0.001   | -3.007±0.002             | -0.799±0.001  | 0.708±0.002 |
| 1.00  | 0.7000±0.0003 | 1.4286±0.0005 | 0.984±0.001   | -3.494±0.001             | -0.589±0.002  | 1.405±0.002 |
| 0.95  | 0.0010±0.0000 | 999±6         | 0.0009±0.0000 | -0.0037±0.0002           | 2.3700±0.0003 | 0.998±0.008 |
| 0.95  | 0.0100±0.0000 | 100.0±0.4     | 0.0092±0.0000 | -0.0739±0.0007           | 2.274±0.001   | 0.967±0.006 |
| 0.95  | 0.0500±0.0001 | 20.00±0.05    | 0.0401±0.0001 | -0.364±0.002             | 1.882±0.002   | 0.845±0.003 |
| 0.95  | 0.1000±0.0005 | 10.00±0.05    | 0.0676±0.0002 | -0.713±0.004             | 1.424±0.006   | 0.712±0.004 |
| 0.95  | 0.1252±0.0009 | 7.99±0.06     | 0.0777±0.0003 | -0.883±0.007             | 1.206±0.009   | 0.653±0.005 |
| 0.95  | 0.167±0.001   | 5.99±0.05     | 0.0903±0.0003 | -1.15±0.01               | 0.88±0.01     | 0.570±0.005 |
| 0.95  | 0.199±0.002   | 5.02±0.04     | 0.0976±0.0003 | -1.34±0.01               | 0.64±0.01     | 0.516±0.004 |
| 0.95  | 0.301±0.004   | 3.32±0.04     | 0.1129±0.0006 | -1.87±0.02               | 0.03±0.02     | 0.394±0.006 |
| 0.95  | 0.400±0.003   | 2.50±0.02     | 0.1289±0.0007 | -2.31±0.01               | -0.44±0.01    | 0.339±0.003 |
| 0.95  | 0.500±0.001   | 1.999±0.005   | 0.1689±0.0007 | -2.731±0.006             | -0.832±0.005  | 0.355±0.002 |
| 0.95  | 0.6000±0.0005 | 1.667±0.001   | 0.318±0.001   | -3.201±0.003             | -1.086±0.002  | 0.557±0.002 |
| 0.95  | 0.6999±0.0002 | 1.4288±0.0005 | 0.813±0.002   | -3.717±0.001             | -0.944±0.002  | 1.223±0.002 |

Continued next page

**Table 4 contd.**

| $T^*$ | $n^*$         | $v^*$         | $P^*$         | $U_p^*/Nk_B T^*$ | $H^*/N$       | $Z$         |
|-------|---------------|---------------|---------------|------------------|---------------|-------------|
| 0.90  | 0.0010±0.0000 | 997±5         | 0.0009±0.0000 | -0.0041±0.0003   | 2.2447±0.0004 | 0.998±0.007 |
| 0.90  | 0.0100±0.0000 | 100.1±0.4     | 0.0087±0.0000 | -0.081±0.001     | 2.144±0.001   | 0.963±0.005 |
| 0.90  | 0.0500±0.0002 | 20.0±0.1      | 0.0371±0.0001 | -0.404±0.002     | 1.728±0.003   | 0.825±0.004 |
| 0.90  | 0.0999±0.0006 | 10.0±0.1      | 0.0605±0.0002 | -0.796±0.006     | 1.239±0.008   | 0.673±0.005 |
| 0.90  | 0.1247±0.0009 | 8.0±0.1       | 0.0681±0.0002 | -0.987±0.009     | 1.01±0.01     | 0.607±0.005 |
| 0.90  | 0.167±0.002   | 6.0±0.1       | 0.0766±0.0003 | -1.29±0.02       | 0.65±0.02     | 0.511±0.006 |
| 0.90  | 0.197±0.003   | 5.1±0.1       | 0.0805±0.0003 | -1.49±0.02       | 0.42±0.02     | 0.454±0.007 |
| 0.90  | 0.299±0.009   | 3.3±0.1       | 0.0858±0.0004 | -2.07±0.04       | -0.23±0.05    | 0.32±0.01   |
| 0.90  | 0.402±0.007   | 2.49±0.04     | 0.0893±0.0007 | -2.53±0.03       | -0.71±0.03    | 0.247±0.005 |
| 0.90  | 0.501±0.002   | 1.998±0.008   | 0.1067±0.0008 | -2.945±0.009     | -1.087±0.008  | 0.237±0.002 |
| 0.90  | 0.6001±0.0007 | 1.666±0.002   | 0.2117±0.0009 | -3.421±0.003     | -1.376±0.003  | 0.392±0.002 |
| 0.90  | 0.7001±0.0003 | 1.4283±0.0005 | 0.6430±0.0016 | -3.967±0.001     | -1.302±0.002  | 1.020±0.003 |
| 0.85  | 0.0010±0.0000 | 998±5         | 0.0009±0.0000 | -0.0043±0.0002   | 2.1196±0.0004 | 0.998±0.007 |
| 0.85  | 0.0100±0.0000 | 100.0±0.4     | 0.0081±0.0000 | -0.091±0.001     | 2.012±0.001   | 0.958±0.005 |
| 0.85  | 0.0500±0.0002 | 20.0±0.1      | 0.0340±0.0001 | -0.456±0.002     | 1.567±0.003   | 0.800±0.003 |
| 0.85  | 0.1001±0.0008 | 10.0±0.1      | 0.0531±0.0002 | -0.91±0.01       | 1.03±0.01     | 0.624±0.005 |
| 0.85  | 0.125±0.002   | 8.0±0.1       | 0.0581±0.0002 | -1.14±0.02       | 0.77±0.02     | 0.548±0.007 |
| 0.85* | 0.166±0.004   | 6.0±0.2       | 0.0618±0.0003 | -1.52±0.04       | 0.36±0.04     | 0.44±0.01   |
| 0.85* | 0.499±0.009   | 2.00±0.04     | 0.050±0.001   | -3.21±0.03       | -1.36±0.03    | 0.119±0.003 |
| 0.85* | 0.600±0.001   | 1.665±0.003   | 0.108±0.001   | -3.674±0.005     | -1.668±0.004  | 0.212±0.002 |
| 0.85  | 0.7000±0.0003 | 1.4286±0.0006 | 0.470±0.002   | -4.246±0.002     | -1.663±0.002  | 0.790±0.003 |
| 0.80  | 0.0010±0.0000 | 999±6         | 0.0008±0.0000 | -0.0053±0.0003   | 1.9938±0.0005 | 0.997±0.009 |
| 0.80  | 0.0100±0.0000 | 100.0±0.4     | 0.0076±0.0000 | -0.102±0.001     | 1.881±0.001   | 0.953±0.005 |
| 0.80* | 0.0501±0.0002 | 19.97±0.09    | 0.0308±0.0001 | -0.524±0.004     | 1.397±0.005   | 0.769±0.004 |
| 0.80* | 0.101±0.002   | 9.9±0.2       | 0.0448±0.0002 | -1.12±0.03       | 0.75±0.03     | 0.554±0.009 |
| 0.80* | 0.12±0.02     | 8±1           | 0.0430±0.0003 | -1.6±0.3         | 0.3±0.3       | 0.43±0.06   |
| 0.80* | 0.600±0.001   | 1.667±0.004   | 0.009±0.001   | -3.965±0.007     | -1.957±0.005  | 0.019±0.003 |
| 0.80  | 0.7000±0.0003 | 1.4285±0.0005 | 0.295±0.002   | -4.562±0.001     | -2.027±0.002  | 0.528±0.003 |

\* Data points in the two-phase region, between the binodal and spinodal curves.

**Table 5.** Data for coexisting gas and liquid obtained with Gibbs ensemble Monte Carlo simulations.

| $T^*$  | $P^*$  | $n_{\text{gas}}^*$ | $n_{\text{liquid}}^*$ | $(U/N)_{\text{gas}}^*$ | $(U/N)_{\text{liquid}}^*$ |
|--------|--------|--------------------|-----------------------|------------------------|---------------------------|
| 0.5500 | 0.0021 | 0.0040             | 0.8041                | 0.7730                 | -3.6181                   |
| 0.6000 | 0.0046 | 0.0083             | 0.7780                | 0.8045                 | -3.3484                   |
| 0.6250 | 0.0065 | 0.0115             | 0.7640                | 0.8118                 | -3.2094                   |
| 0.6500 | 0.0089 | 0.0154             | 0.7490                | 0.8131                 | -3.0673                   |
| 0.6750 | 0.0119 | 0.0205             | 0.7331                | 0.8043                 | -2.9209                   |
| 0.7000 | 0.0157 | 0.0270             | 0.7158                | 0.7883                 | -2.7695                   |
| 0.7250 | 0.0202 | 0.0351             | 0.6972                | 0.7586                 | -2.6132                   |
| 0.7500 | 0.0256 | 0.0450             | 0.6760                | 0.7203                 | -2.4466                   |
| 0.7750 | 0.0324 | 0.0589             | 0.6529                | 0.6505                 | -2.2737                   |
| 0.8000 | 0.0399 | 0.0753             | 0.6250                | 0.5699                 | -2.0828                   |
| 0.8250 | 0.0490 | 0.0996             | 0.5910                | 0.4383                 | -1.8700                   |
| 0.8500 | 0.0597 | 0.1356             | 0.5449                | 0.2410                 | -1.6154                   |

**Table 6.** Data for coexisting solid and liquid obtained with MD simulations as described in Section 2.2.3

| $T^*$  | $n_{\text{solid}}^*$ | $n_{\text{liquid}}^*$ |
|--------|----------------------|-----------------------|
| 0.6000 | 0.9147               | 0.8280                |
| 0.6500 | 0.9359               | 0.8487                |
| 0.7000 | 0.9462               | 0.8618                |
| 0.8000 | 0.9568               | 0.8842                |

**Table 7.** Data for coexisting solid and gas obtained with MD simulations as described in Section 2.2.2

| $T^*$  | $n_{\text{solid}}^*$ | $n_{\text{gas}}^*$ |
|--------|----------------------|--------------------|
| 0.4000 | 0.9238               | 0.0001             |
| 0.4500 | 0.9063               | 0.0005             |
| 0.5000 | 0.9138               | 0.0015             |
